# Supplementary material for: Transcription repressor Bach2 is required for pulmonary surfactant homeostasis and alveolar macrophage function
Source: PubMed Central journal article supplement — J Exp Med. 2013 Oct 21;210(11):2191–204. doi: 10.1084/jem.20130028 (PMC3804940; doi:10.1084/jem.20130028), 2013-10-21
Supplement: supp_jem.20130028_JEM_20130028_sm.pdf [file supp_jem.20130028_JEM_20130028_sm.pdf]

## SUPPLEMENTAL MATERIAL

Nakamura et al., <http://www.jem.org/cgi/content/full/jem.20130028/DC1>**Table S1.** Sequences of the primers used for RT-PCR

| Target            | Forward primer                | Reverse primer                |
|-------------------|-------------------------------|-------------------------------|
| $\beta$ -Actin    | 5'-CGTTGACATCCGTAAAGACCTC-3'  | 5'-AGCCACCGATCCACACAGA-3'     |
| SP-A              | 5'-GAGGAGCTCAGACTGCACTC-3'    | 5'-GAGTGCAGTCTGAAGCTCCTC-3'   |
| SP-B              | 5'-CTGCTTCTACCTCTGC-3'        | 5'-CTTGGCACAGGTCATTAGCTC-3'   |
| SP-C              | 5'-ATGGACATGAGTAGCAAAGAGGT-3' | 5'-CACGATGAGAAGGCGTTTGAG-3'   |
| SP-D              | 5'-CAAAGGGAGAACGTGGACTA-3'    | 5'-CTTTGCCCTGTAGATCCT-3'      |
| Bach2             | 5'-AGTTCATCCACGACATCC-3'      | 5'-AGGTGATTCCTCTCCGAC-3'      |
| Pparg1            | 5'-TGTGAGACCAACAGCCTGAC-3'    | 5'-TATCAGTGGTTCACCGTTC-3'     |
| Lxr $\alpha$      | 5'-TGGAGACGTACGGAGGTACA-3'    | 5'-CAGCTCATTATGGCTCTGGA-3'    |
| Abca1             | 5'-CTCAGTTAAGGCTGCTGCTG-3'    | 5'-TCAGGCGTACAGAGATCAGG-3'    |
| Abcg1             | 5'-GCCTACTACCTGGCAAAGACC-3'   | 5'-AGCAGCGAACAGCACAAAAC-3'    |
| GM-CSF            | 5'-TTGAACATGACAGCCAGCTA-3'    | 5'-GCATTCAAAGGGGATATCAG-3'    |
| GM-CSFR $\alpha$  | 5'-GAGTGACGTGCAGGAGGTTT-3'    | 5'-TTCCTGTCAGTCACGTTGGG-3'    |
| GM-CSFR $\beta$ c | 5'-AACATGACCCCTATCACCAG-3'    | 5'-GGAGTAGTAGTCTTCGTTTGA-3'   |
| PU.1              | 5'-GATGCACGTCCTCGATACTC-3'    | 5'-TCATCTGAGCTCTGCTGGTG-3'    |
| Ccl2              | 5'-CAGGTCCTGTCTGCTTC-3'       | 5'-TGAGTGGGGCGTAACTGC-3'      |
| Ccl24             | 5'-CTCATCTTGCTGCACGTC-3'      | 5'-GGGGTCAGTACAGATCTTATGG-3'  |
| Cxcl1             | 5'-ATGTGTGGGAGGCTGTGTTT-3'    | 5'-AGCGAGACGAGACCAGGAG-3'     |
| Il-6              | 5'-GATGCTACAAACTGGATATATTC-3' | 5'-GGTCCTTAGCCACTCCTTCTGTG-3' |
| Il-1b             | 5'-AAGGAGAACCAAGCAACGA-3'     | 5'-CTCCACTTTGCTCTTGACTTCTA-3' |
| Arg1              | 5'-GGAAAGTCCCAGATGTACC-3'     | 5'-CCCAGCTTGTCTACTTCAG-3'     |
| Ym1               | 5'-TCAACGGTTTTCCACAG-3'       | 5'-GTACAGCAGACAAGACATCC-3'    |
| Retlna            | 5'-GTGTCAAGACTATGAACAGATG-3'  | 5'-TGGTCCAGTCAACGAGTA-3'      |
| Mrc1              | 5'-CATCTCGGGCCTTGGGAATA-3'    | 5'-TGACCACTCCTGCTGCTTTAG-3'   |
| Blimp-1           | 5'-CCCTCATCGGTGAAGTCTA-3'     | 5'-ACGTAGCGCATCCAGTTG-3'      |
| Irf4              | 5'-TGTGCTCTGAACAAGAGCAAT-3'   | 5'-TATGAACCTGCTGGGCTGG-3'     |

**Table S2.** GO analysis of genes with >10-fold up-regulation

| GO accession number              | GO term                                                 | Corrected p-value   |
|----------------------------------|---------------------------------------------------------|---------------------|
| GO:0044421                       | Extracellular region part                               | 9.57 <sup>-15</sup> |
| GO:0005576                       | Extracellular region                                    | 6.18 <sup>-14</sup> |
| GO:0009611 GO:0002245            | Response to wounding                                    | 9.36 <sup>-13</sup> |
| GO:0005615                       | Extracellular space                                     | 5.45 <sup>-12</sup> |
| GO:0040011                       | Locomotion                                              | 1.00 <sup>-10</sup> |
| GO:0006954                       | Inflammatory response                                   | 2.33 <sup>-8</sup>  |
| GO:0032879                       | Regulation of localization                              | 3.29 <sup>-8</sup>  |
| GO:0048518 GO:0043119            | Positive regulation of biological process               | 3.88 <sup>-8</sup>  |
| GO:0009605                       | Response to external stimulus                           | 4.36 <sup>-8</sup>  |
| GO:0048731                       | System development                                      | 2.04 <sup>-7</sup>  |
| GO:0048856                       | Anatomical structure development                        | 3.50 <sup>-7</sup>  |
| GO:0032502                       | Developmental process                                   | 7.13 <sup>-7</sup>  |
| GO:0030334                       | Regulation of cell migration                            | 7.13 <sup>-7</sup>  |
| GO:0030335                       | Positive regulation of cell migration                   | 7.13 <sup>-7</sup>  |
| GO:0005102                       | Receptor binding                                        | 7.13 <sup>-7</sup>  |
| GO:0050896 GO:0051869            | Response to stimulus                                    | 7.13 <sup>-7</sup>  |
| GO:2000147                       | Positive regulation of cell motility                    | 7.13 <sup>-7</sup>  |
| GO:2000145                       | Regulation of cell motility                             | 9.74 <sup>-7</sup>  |
| GO:0051272                       | Positive regulation of cellular component movement      | 1.02 <sup>-6</sup>  |
| GO:0048522 GO:0051242            | Positive regulation of cellular process                 | 1.03 <sup>-6</sup>  |
| GO:0040017                       | Positive regulation of locomotion                       | 1.03 <sup>-6</sup>  |
| GO:0009653                       | Anatomical structure morphogenesis                      | 2.24 <sup>-6</sup>  |
| GO:0006935                       | Chemotaxis                                              | 3.06 <sup>-6</sup>  |
| GO:0042330                       | Taxis                                                   | 3.12 <sup>-6</sup>  |
| GO:0051270                       | Regulation of cellular component movement               | 3.13 <sup>-6</sup>  |
| GO:0007275                       | Multicellular organismal development                    | 3.33 <sup>-6</sup>  |
| GO:0040012                       | Regulation of locomotion                                | 3.33 <sup>-6</sup>  |
| GO:0042127                       | Regulation of cell proliferation                        | 4.63 <sup>-6</sup>  |
| GO:0071944                       | Cell periphery                                          | 1.37 <sup>-5</sup>  |
| GO:0005886 GO:0005904            | Plasma membrane                                         | 2.02 <sup>-5</sup>  |
| GO:0051239                       | Regulation of multicellular organismal process          | 2.15 <sup>-5</sup>  |
| GO:0048583                       | Regulation of response to stimulus                      | 2.18 <sup>-5</sup>  |
| GO:0065009                       | Regulation of molecular function                        | 2.31 <sup>-5</sup>  |
| GO:0065007                       | Biological regulation                                   | 3.77 <sup>-5</sup>  |
| GO:0016477                       | Cell migration                                          | 3.90 <sup>-5</sup>  |
| GO:0001936                       | Regulation of endothelial cell proliferation            | 4.54 <sup>-5</sup>  |
| GO:0044699                       | Single-organism process                                 | 4.54 <sup>-5</sup>  |
| GO:0048513                       | Organ development                                       | 4.54 <sup>-5</sup>  |
| GO:0051674                       | Localization of cell                                    | 5.03 <sup>-5</sup>  |
| GO:0048870                       | Cell motility                                           | 5.03 <sup>-5</sup>  |
| GO:0051049                       | Regulation of transport                                 | 7.48 <sup>-5</sup>  |
| GO:0002682                       | Regulation of immune system process                     | 7.56 <sup>-5</sup>  |
| GO:0008284                       | Positive regulation of cell proliferation               | 1.14 <sup>-4</sup>  |
| GO:0006928                       | Cellular component movement                             | 1.20 <sup>-4</sup>  |
| GO:0006952 GO:0002217 GO:0042829 | Defense response                                        | 1.27 <sup>-4</sup>  |
| GO:0002376                       | Immune system process                                   | 1.87 <sup>-4</sup>  |
| GO:0051240                       | Positive regulation of multicellular organismal process | 1.91 <sup>-4</sup>  |
| GO:0005178                       | Integrin binding                                        | 1.91 <sup>-4</sup>  |
| GO:0005515 GO:0045308            | Protein binding                                         | 1.95 <sup>-4</sup>  |

**Table S2.** GO analysis of genes with >10-fold up-regulation (*Continued*)

| GO accession number              | GO term                                                   | Corrected p-value  |
|----------------------------------|-----------------------------------------------------------|--------------------|
| GO:0050789 GO:0050791            | Regulation of biological process                          | 2.26 <sup>-4</sup> |
| GO:0001944                       | Vasculature development                                   | 2.50 <sup>-4</sup> |
| GO:0001568                       | Blood vessel development                                  | 3.48 <sup>-4</sup> |
| GO:0001938                       | Positive regulation of endothelial cell proliferation     | 4.75 <sup>-4</sup> |
| GO:0045785                       | Positive regulation of cell adhesion                      | 5.07 <sup>-4</sup> |
| GO:0050678                       | Regulation of epithelial cell proliferation               | 6.55 <sup>-4</sup> |
| GO:0006950                       | Response to stress                                        | 6.55 <sup>-4</sup> |
| GO:0072359                       | Circulatory system development                            | 6.76 <sup>-4</sup> |
| GO:0072358                       | Cardiovascular system development                         | 6.76 <sup>-4</sup> |
| GO:0008289                       | Lipid binding                                             | 7.88 <sup>-4</sup> |
| GO:0050790                       | Regulation of catalytic activity                          | 7.88 <sup>-4</sup> |
| GO:0030155                       | Regulation of cell adhesion                               | 9.02 <sup>-4</sup> |
| GO:0010646                       | Regulation of cell communication                          | 9.45 <sup>-4</sup> |
| GO:0044093                       | Positive regulation of molecular function                 | 9.51 <sup>-4</sup> |
| GO:0023051                       | Regulation of signaling                                   | 0.001032084        |
| GO:0030324                       | Lung development                                          | 0.001047604        |
| GO:0030323                       | Respiratory tube development                              | 0.001107489        |
| GO:0050793                       | Regulation of developmental process                       | 0.001242768        |
| GO:0046852                       | Positive regulation of bone remodeling                    | 0.00143183         |
| GO:0000050 GO:0006594 GO:0006871 | Urea cycle                                                | 0.00143183         |
| GO:0019627                       | Urea metabolic process                                    | 0.00143183         |
| GO:0033993                       | Response to lipid                                         | 0.00143183         |
| GO:0045860                       | Positive regulation of protein kinase activity            | 0.00143183         |
| GO:0045780                       | Positive regulation of bone resorption                    | 0.00143183         |
| GO:0005488                       | Binding                                                   | 0.00143183         |
| GO:0071941                       | Nitrogen cycle metabolic process                          | 0.00143183         |
| GO:0050679                       | Positive regulation of epithelial cell proliferation      | 0.00143183         |
| GO:0048646                       | Anatomical structure formation involved in morphogenesis  | 0.001574635        |
| GO:0009966 GO:0035466            | Regulation of signal transduction                         | 0.001574635        |
| GO:0008009                       | Chemokine activity                                        | 0.001581875        |
| GO:0051897                       | Positive regulation of protein kinase B signaling cascade | 0.001876034        |
| GO:2000026                       | Regulation of multicellular organismal development        | 0.001876731        |
| GO:0042060                       | Wound healing                                             | 0.002262661        |
| GO:0009986 GO:0009928 GO:0009929 | Cell surface                                              | 0.002267849        |
| GO:0033674                       | Positive regulation of kinase activity                    | 0.002267849        |
| GO:0060541                       | Respiratory system development                            | 0.002629323        |
| GO:0048286                       | Lung alveolus development                                 | 0.002918511        |
| GO:0051347                       | Positive regulation of transferase activity               | 0.003309521        |
| GO:0005125                       | Cytokine activity                                         | 0.004327569        |
| GO:0016020                       | Membrane                                                  | 0.004495516        |
| GO:0034105                       | Positive regulation of tissue remodeling                  | 0.00455367         |
| GO:0006525                       | Arginine metabolic process                                | 0.00455367         |
| GO:0048519 GO:0043118            | Negative regulation of biological process                 | 0.004751381        |
| GO:0009888                       | Tissue development                                        | 0.004872057        |
| GO:0031012                       | Extracellular matrix                                      | 0.005179694        |
| GO:0010033                       | Response to organic substance                             | 0.005179694        |
| GO:0065008                       | Regulation of biological quality                          | 0.005311207        |
| GO:0042221                       | Response to chemical stimulus                             | 0.005469468        |
| GO:0042379                       | Chemokine receptor binding                                | 0.005469468        |
| GO:0010941                       | Regulation of cell death                                  | 0.005718335        |
| GO:0010562                       | Positive regulation of phosphorus metabolic process       | 0.006022319        |
| GO:0045937                       | Positive regulation of phosphate metabolic process        | 0.006022319        |

**Table S2.** GO analysis of genes with >10-fold up-regulation (*Continued*)

| GO accession number   | GO term                                                 | Corrected p-value |
|-----------------------|---------------------------------------------------------|-------------------|
| GO:0048869            | Cellular developmental process                          | 0.006868979       |
| GO:0051056            | Regulation of small GTPase mediated signal transduction | 0.007710023       |
| GO:0044707            | Single-multicellular organism process                   | 0.008118006       |
| GO:0001934            | Positive regulation of protein phosphorylation          | 0.008670883       |
| GO:0051896            | Regulation of protein kinase B signaling cascade        | 0.008670883       |
| GO:0032501 GO:0050874 | Multicellular organismal process                        | 0.00879704        |

**Table S3.** GO analysis of genes with more than fourfold down-regulation

| GO accession number              | GO term                                                                                   | Corrected p-value  |
|----------------------------------|-------------------------------------------------------------------------------------------|--------------------|
| GO:0071944                       | Cell periphery                                                                            | 8.42 <sup>-5</sup> |
| GO:0005886 GO:0005904            | Plasma membrane                                                                           | 8.42 <sup>-5</sup> |
| GO:0042613                       | MHC class II protein complex                                                              | 0.003423147        |
| GO:0071695                       | Anatomical structure maturation                                                           | 0.004906325        |
| GO:0042611                       | MHC protein complex                                                                       | 0.004906325        |
| GO:0002478                       | Antigen processing and presentation of exogenous peptide antigen                          | 0.005406083        |
| GO:0048820                       | Hair follicle maturation                                                                  | 0.006303758        |
| GO:0019886 GO:0042591 GO:0048005 | Antigen processing and presentation of exogenous peptide antigen via MHC class II         | 0.009633509        |
| GO:0019884                       | Antigen processing and presentation of exogenous antigen                                  | 0.01421624         |
| GO:0002495                       | Antigen processing and presentation of peptide antigen via MHC class II                   | 0.01634329         |
| GO:0005488                       | Binding                                                                                   | 0.018125836        |
| GO:0050870                       | Positive regulation of T cell activation                                                  | 0.02396895         |
| GO:0002504                       | Antigen processing and presentation of peptide or polysaccharide antigen via MHC class II | 0.02396895         |
| GO:0042638                       | Exogen                                                                                    | 0.03296325         |
| GO:0048002                       | Antigen processing and presentation of peptide antigen                                    | 0.036329534        |
| GO:0019882 GO:0030333            | Antigen processing and presentation                                                       | 0.036329534        |
| GO:0045621                       | Positive regulation of lymphocyte differentiation                                         | 0.03917532         |
| GO:0048518 GO:0043119            | Positive regulation of biological process                                                 | 0.03919307         |
| GO:0048583                       | Regulation of response to stimulus                                                        | 0.049198814        |
| GO:0051251                       | Positive regulation of lymphocyte activation                                              | 0.049198814        |
| GO:0044459                       | Plasma membrane part                                                                      | 0.049198814        |
